# Supplementary material
Source: MDPI journal article supplement (https://www.mdpi.com/2073-4352/10/1/36)
Supplement: s1 [file s1]

Table of Contents

Additional Figures: Hirshfeld Analysis and Crystal Structures ..... 1

Additional Figures: Spectroelectrochemical Measurements ..... 3

Hirshfeld Surface Analysis

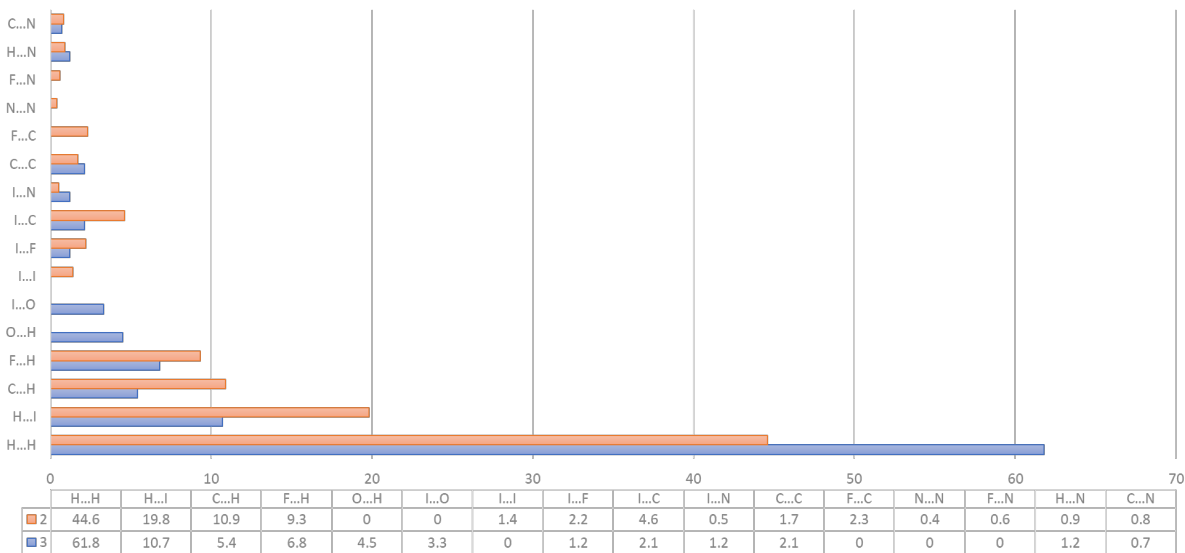

**Figure S1.** Percentage contributions of various intermolecular contacts to the Hirshfeld surface area in **2** and **3**.

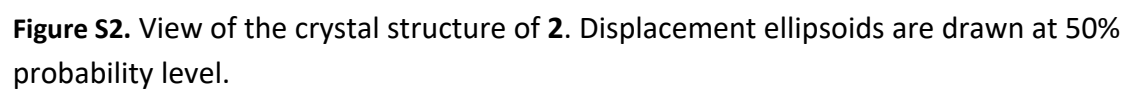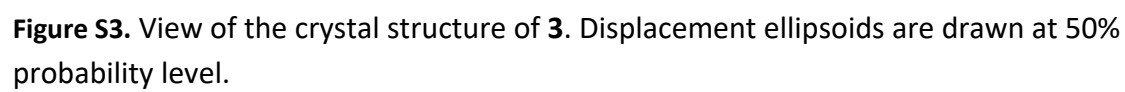

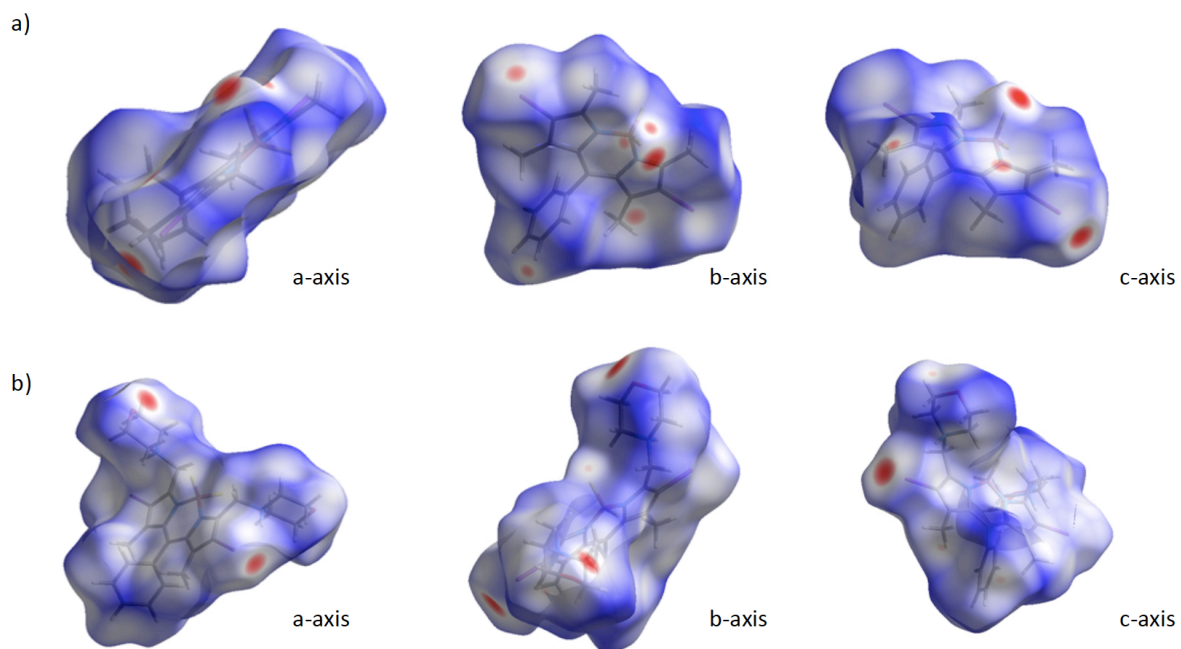

**Figure S4.** Views of the  $d_{\text{norm}}$  surfaces of a) **2** and b) **3**, viewed along different crystallographic axes.

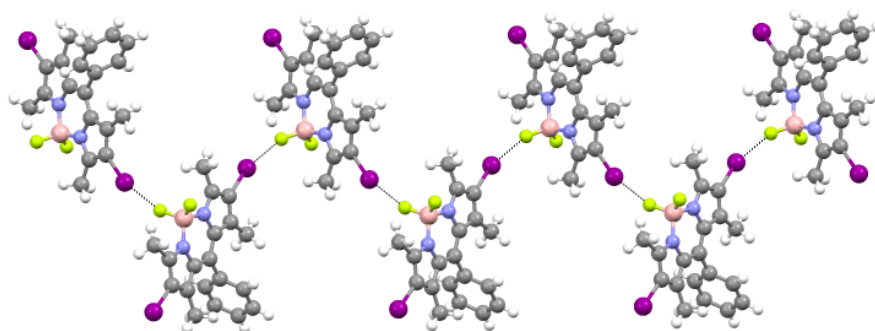

**Figure S5.** Chains observed in **2**, (polymorph I) formed by intermolecular C-I...F interactions.

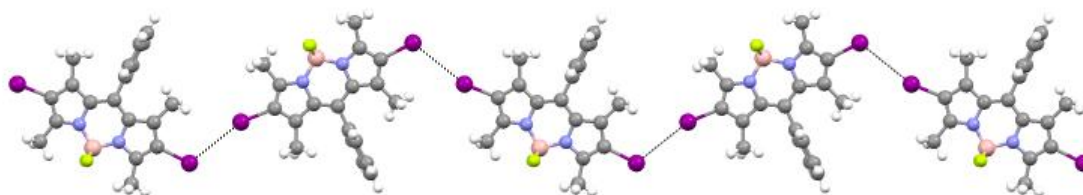

**Figure S6.** Chains observed in polymorph II of ,6-diiodo-1,3,5,7-tetramethyl-8-phenyl-4,4-difluoroboradiazaindacene<sup>35</sup> formed by intermolecular C-I...I interactions.

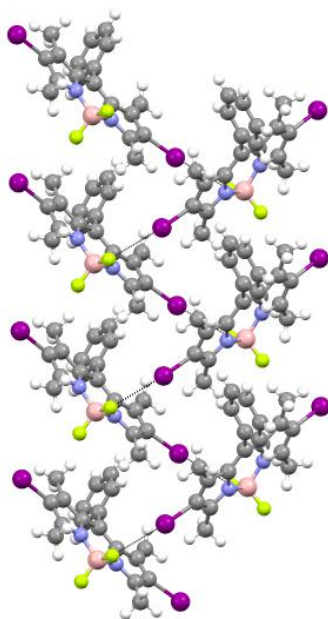

**Figure S7.** Chains observed in polymorph III of ,6-diiodo-1,3,5,7-tetramethyl-8-phenyl-4,4-difluoroboradiazaindacene<sup>36</sup> formed by intermolecular C–I⋯F interactions.

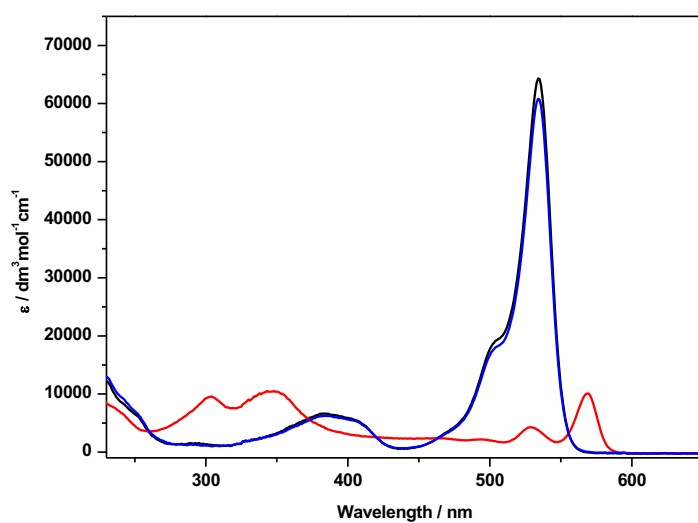

**Figure S8.** UV-vis spectroelectrochemistry of **2** in CH<sub>2</sub>Cl<sub>2</sub> with [tBu<sub>4</sub>N][BF<sub>4</sub>] as electrolyte at 243 K. Black line is the spectral profile of **2** before reduction. Red line is the spectral profile of [2]<sup>−</sup>. Blue line is the spectral profile obtained after the redox cycle.

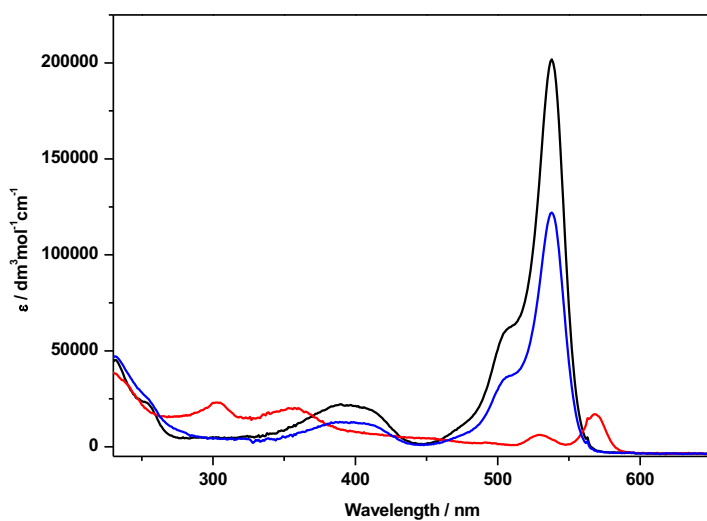

**Figure S9.** UV-vis spectroelectrochemistry of **3** in  $\text{CH}_2\text{Cl}_2$  with  $[\text{nBu}_4\text{N}][\text{BF}_4]$  as electrolyte at 243 K. Black line is the spectral profile of **3** before reduction. Red line is the spectral profile of  $[\mathbf{3}]^-$ . Blue line is the spectral profile obtained after the redox cycle.

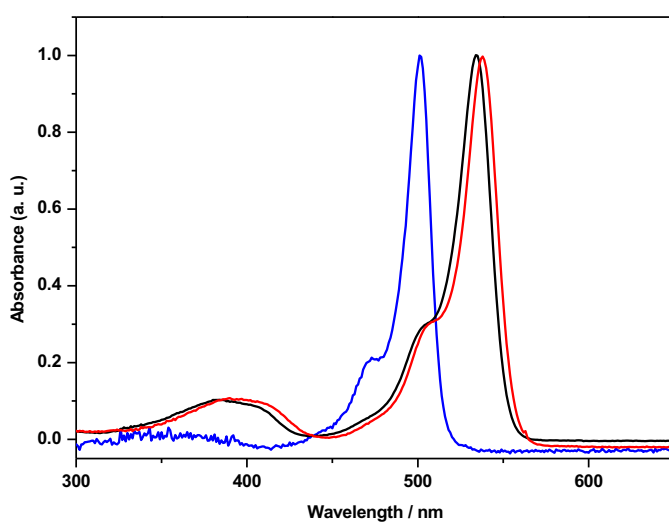

**Figure S10.** Normalized UV-vis absorption spectra of **1** (blue line), **2** (black line) and **3** (red line) in  $\text{CH}_2\text{Cl}_2$  with  $[\text{nBu}_4\text{N}][\text{BF}_4]$  as electrolyte at 243K.
